# Supplementary material for: Positional error in automated geocoding of residential addresses
Source: Springer Nature journal article supplement (doi:10.1186/1476-072x-2-10), 2003-12-19

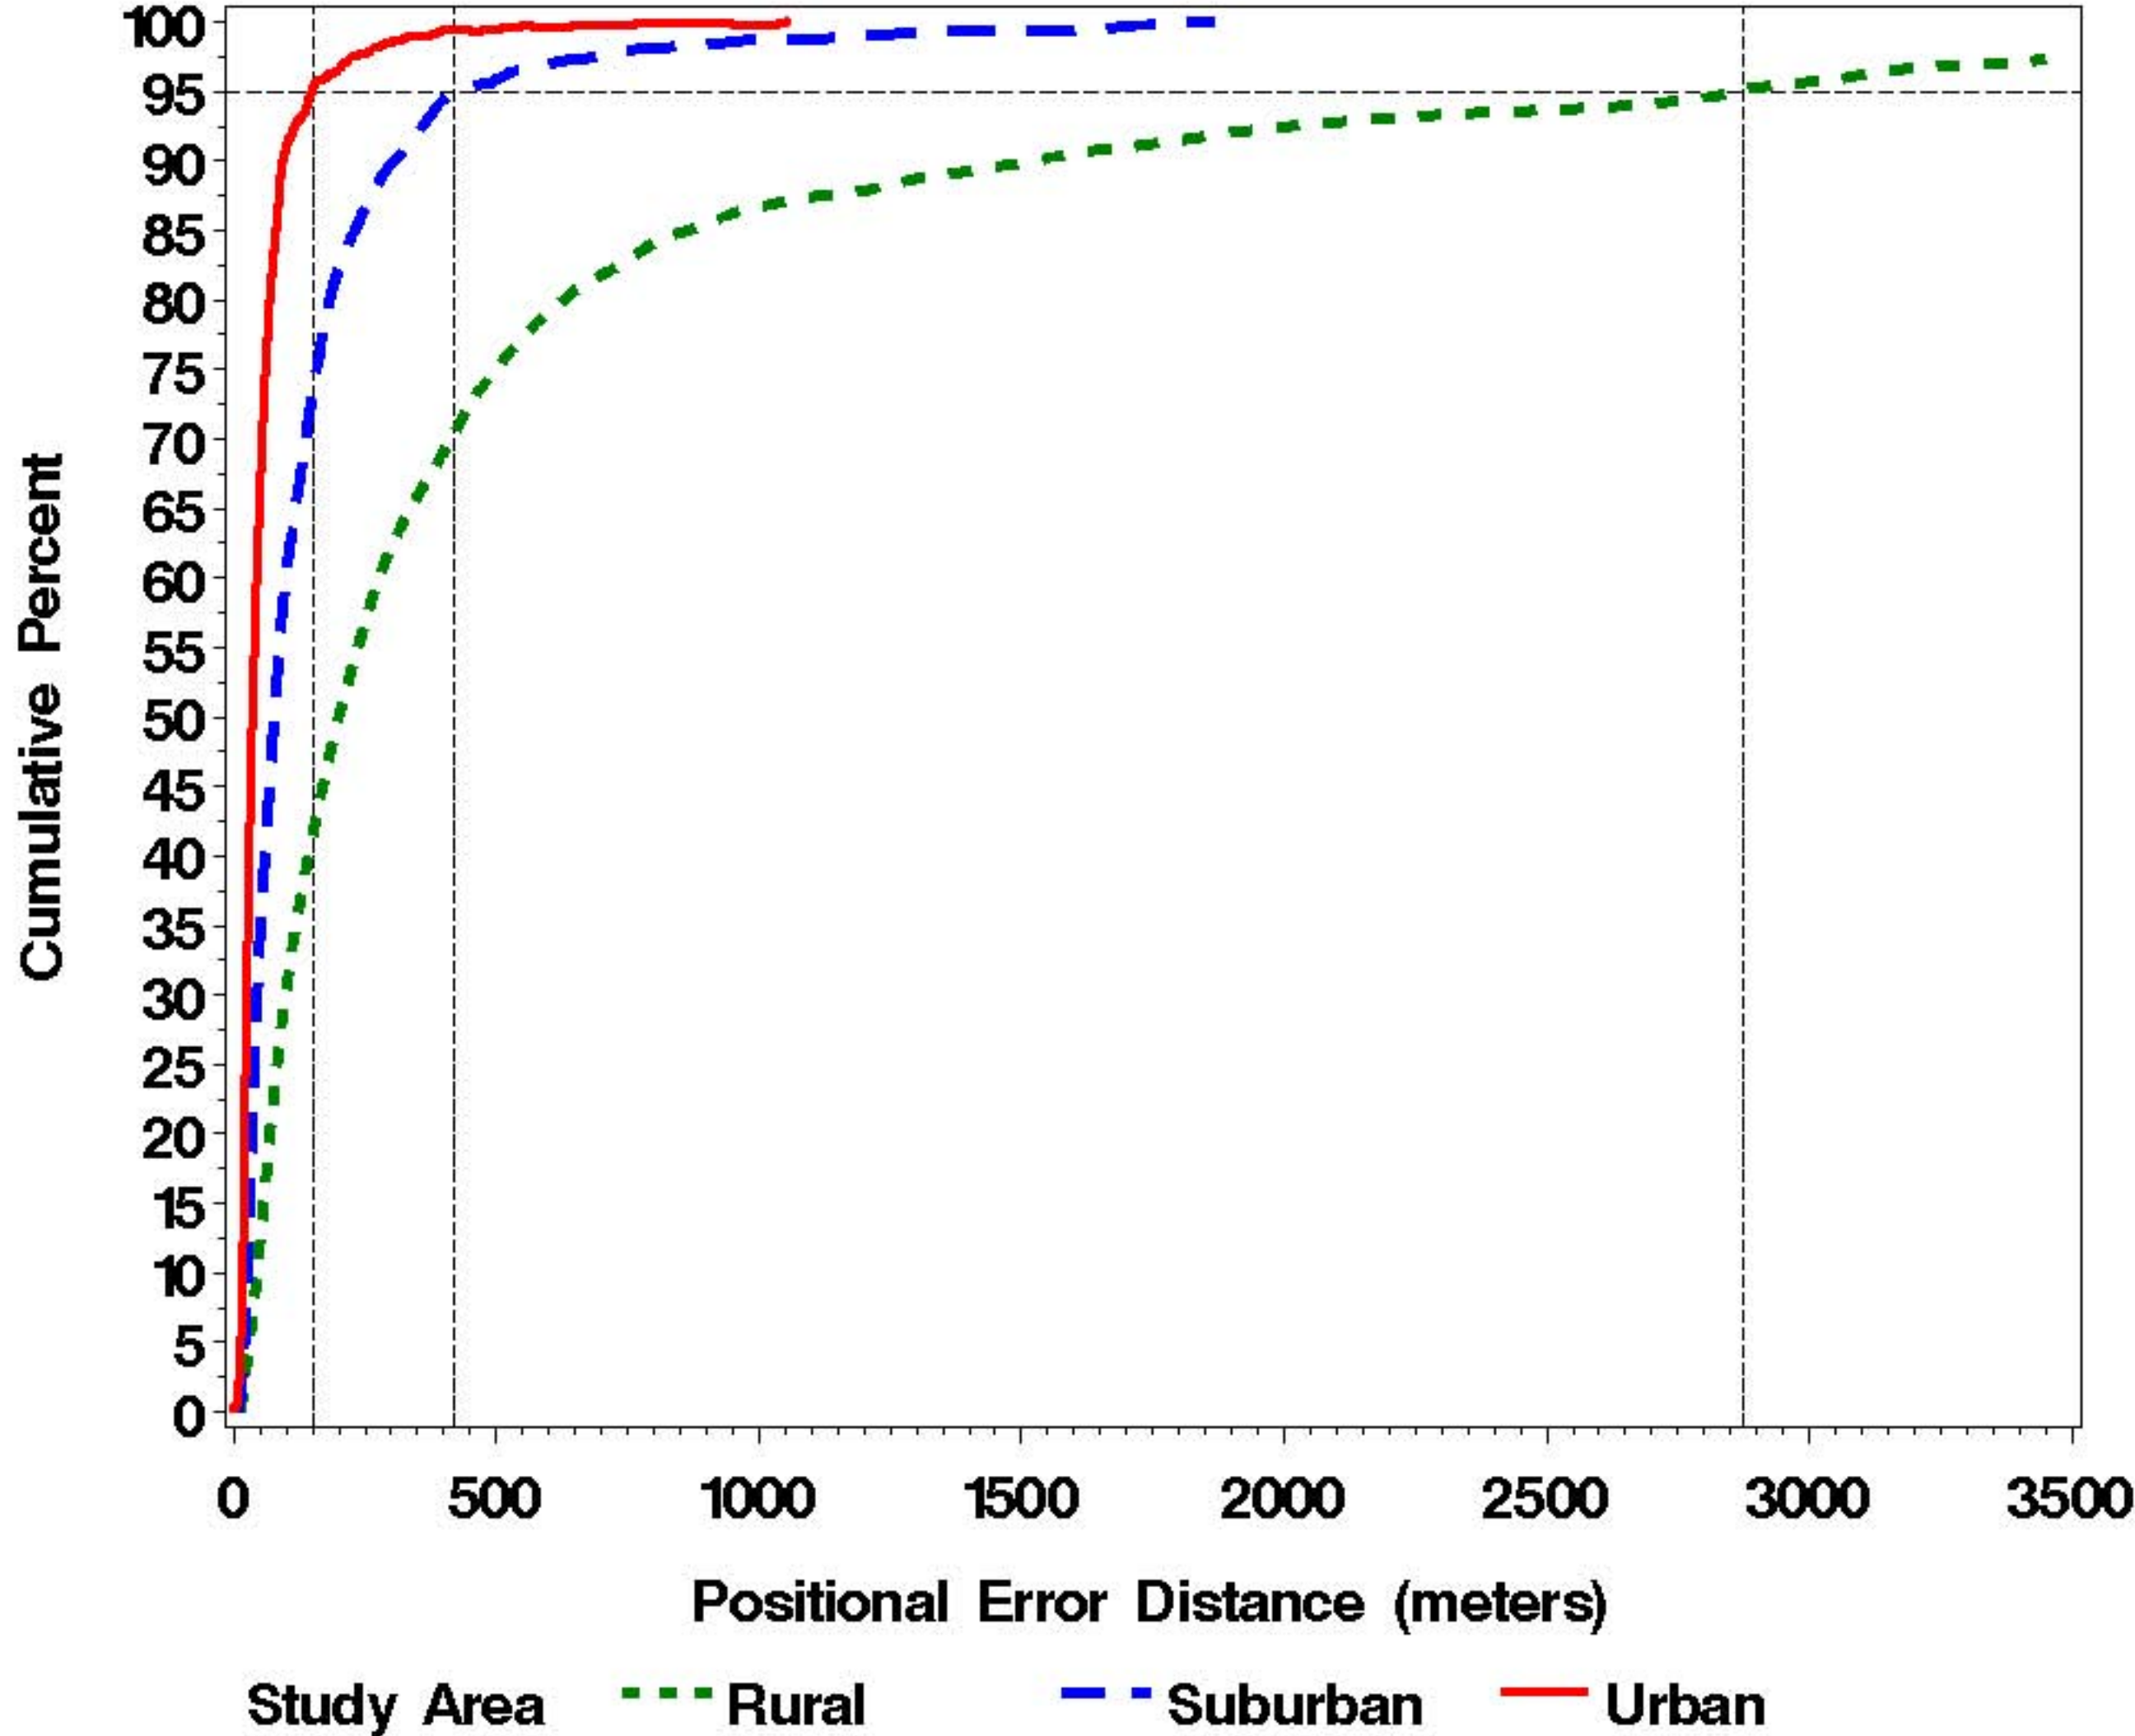

Supplement: 12942_2003_15_MOESM4_ESM.pdf [file 12942_2003_15_MOESM4_ESM.pdf]
